# Supplementary material
Source: publisher figshare collection journal article supplement (https://karger.figshare.com/ndownloader/files/28959558)
Supplement: Supplementary file 1 [file 28959558]

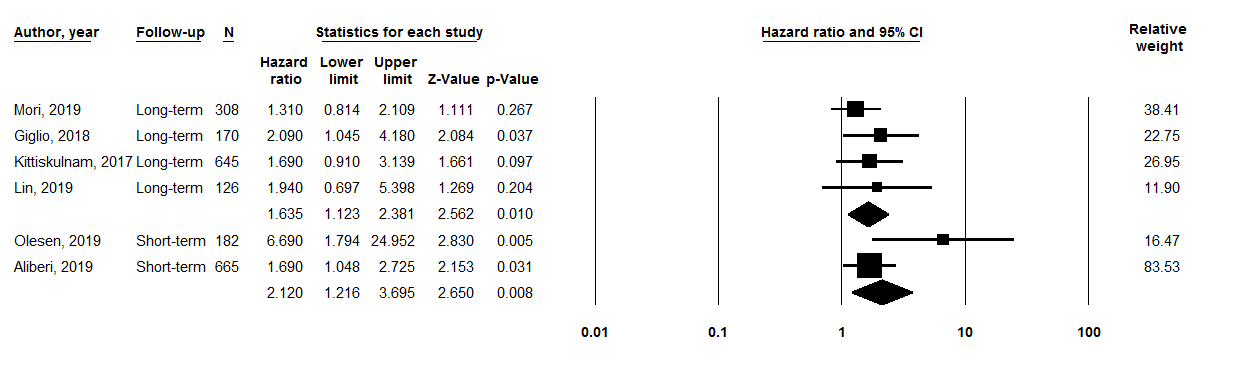
**Supplementary Figure 6.** Meta-analysis of the association between sarcopenia and mortality in outpatients presented by hazard ratios, stratified by long- and short-term follow-up

Heterogeneity (I2): long-term follow-up (0.0%), short-term follow-up (73.03%).
